# Supplementary material for: MEK inhibitors block growth of lung tumours with mutations in ataxia–telangiectasia mutated
Source: PubMed Central journal article supplement (PMC5150652; doi:10.1038/ncomms13701), 2016-12-06
Supplement: ncomms13701-s1.pdf [file ncomms13701-s1.pdf]

# Supplementary Figure 1

## A

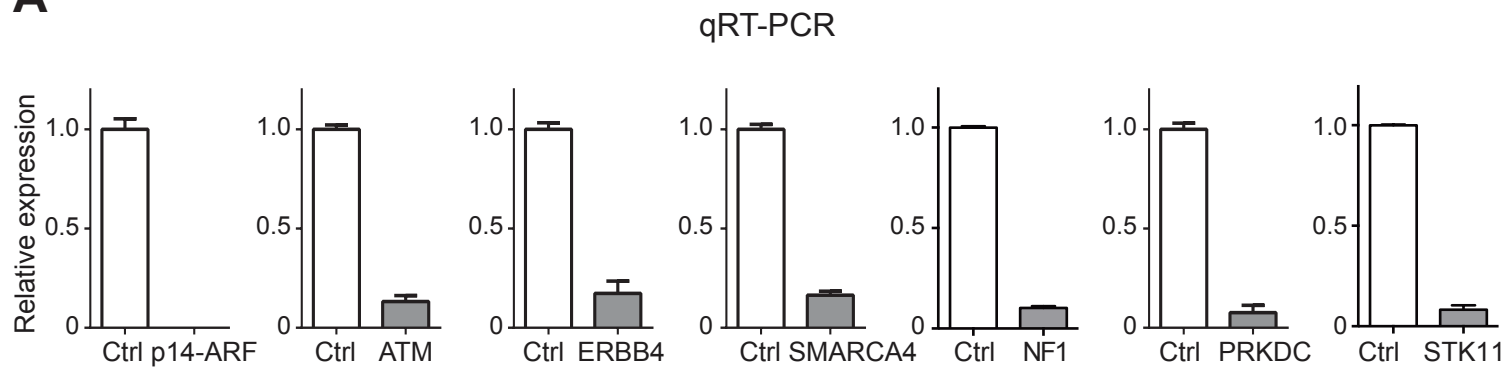

## B

Western blots

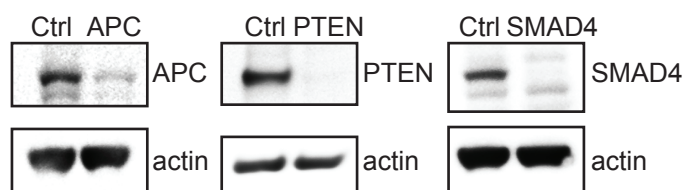

**Supplementary Figure 1.** Validation of vectors used for isogenic cell line panel. **(A)** mRNA expression analysis of indicated knockdown vectors in AALE cells by quantitative real time PCR. GAPDH was used as the reference gene. Error bars indicate standard deviation (n=3). **(B)** Western blot analysis of AALE cells infected with indicated shRNA vectors.

## Supplementary Figure 2

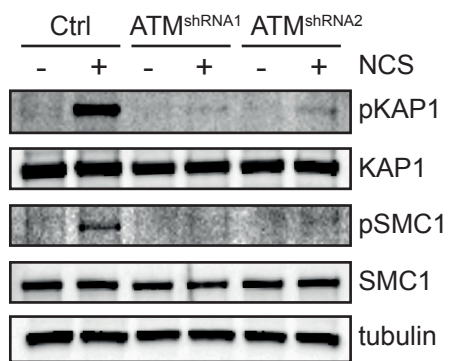

**Supplementary Figure 2. Characterization of ATM knockdown in AALE cells.** Western blot analysis of AALE cells infected with indicated vectors for pKAP1 and pSMC1 in response to treatment with neo-carzinostatin (50 ng/ml, 30 minutes).

### Supplementary Figure 3

**A**

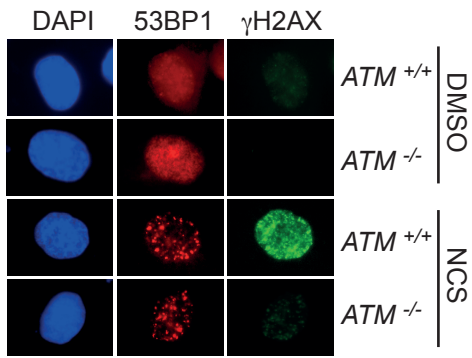

**B**

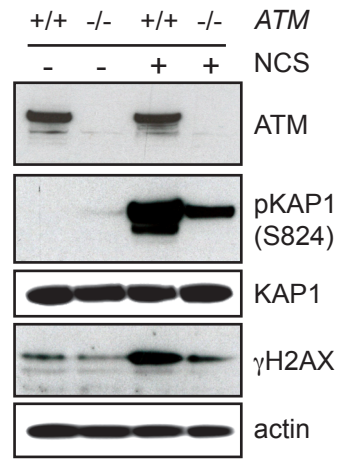

**Supplementary Figure 3. Validation of ATM inactivation. (A)** Immunofluorescence microscopy analysis of ATM knockout and control NCI-H322 cells for 53BP1 and phosphorylated H2AX ( $\gamma$ H2AX; S139) treated with neocarzinostatin (50 ng/ml, 30 minutes). **(B)** Western blot analysis of NCI-H322 cells as in (A).

## Supplementary Figure 4

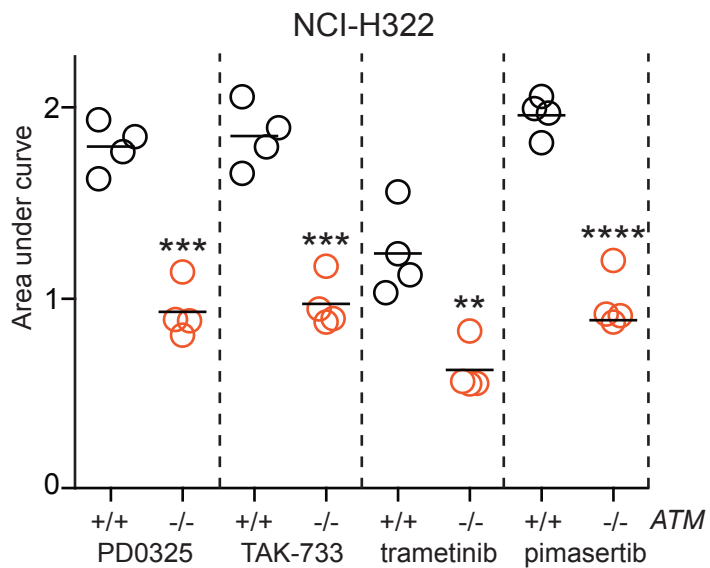

**Supplementary Figure 4. ATM inactivation using CRISPR/Cas9 engineering renders lung cancer cell lines sensitive to MEK inhibition.** Area under curve (AUC) of dose-response experiment of NCI-H322 cells in which both ATM alleles have been inactivated (ATM<sup>-/-</sup>) or unedited control (ATM<sup>+/+</sup>) treated with depicted compounds for 5 days. Each circle represents an independent clone. Data is normalized to vehicle treated cells. \*\* P < 0.01, \*\*\* P < 0.001, \*\*\*\* P < 0.0001, two sided t test.

## Supplementary Figure 5

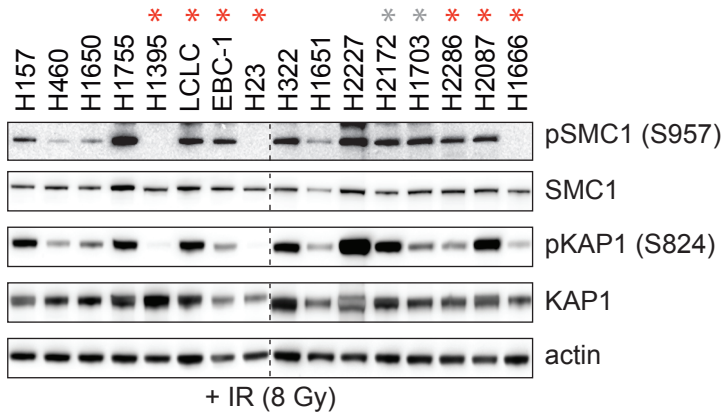

**Supplementary Figure 5. DNA damage response of ATM mutant lung cancer cell lines.** Western blot analysis of indicated lung cancer cell lines treated with ionizing radiation (8 Gy). Red asterisks indicate cell lines with confirmed ATM mutations, grey asterisks indicate cell lines with presumably neutral mutations (PolyPhen).

# Supplementary Figure 6 (I)

## A

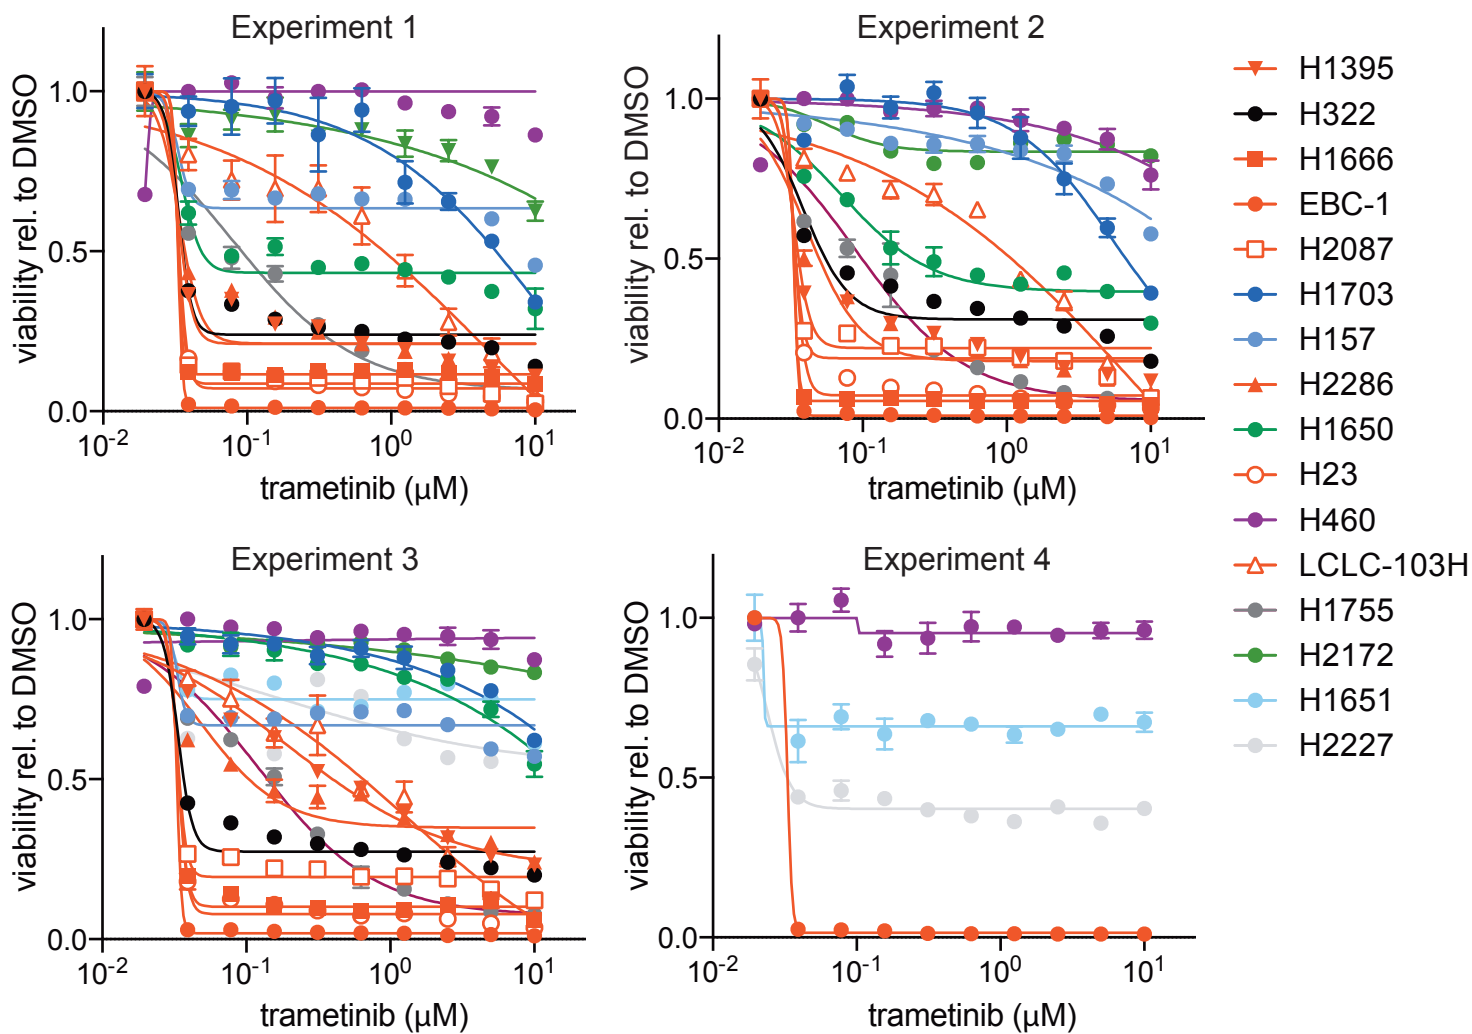

## B

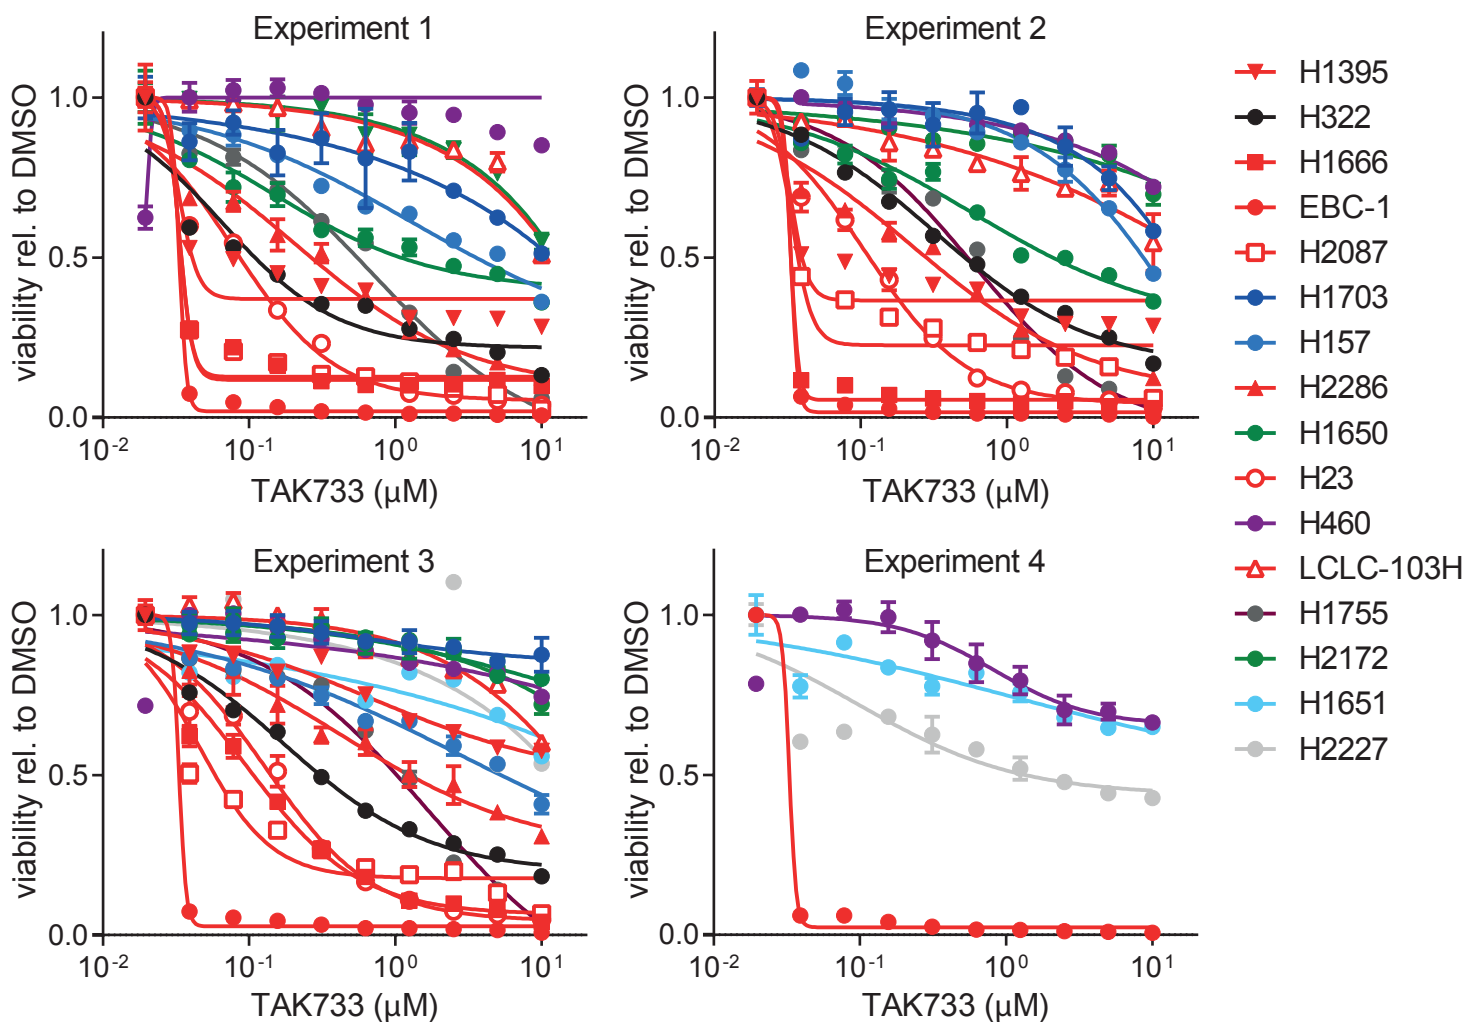

## Supplementary Figure 6 (II)

**Supplementary Figure 6. Response of lung cancer cell lines to MEK inhibitors. (A, B)** Individual dose-response experiments for 16 lung cancer cell lines treated with trametinib (A) or TAK733 (B). Data was normalized to vehicle treated cells and error bars indicate standard deviation derived from replicate drug treatments (n = 3). Cell lines with damaging ATM mutations (PolyPhen) are labeled in red.

## Supplementary Figure 7

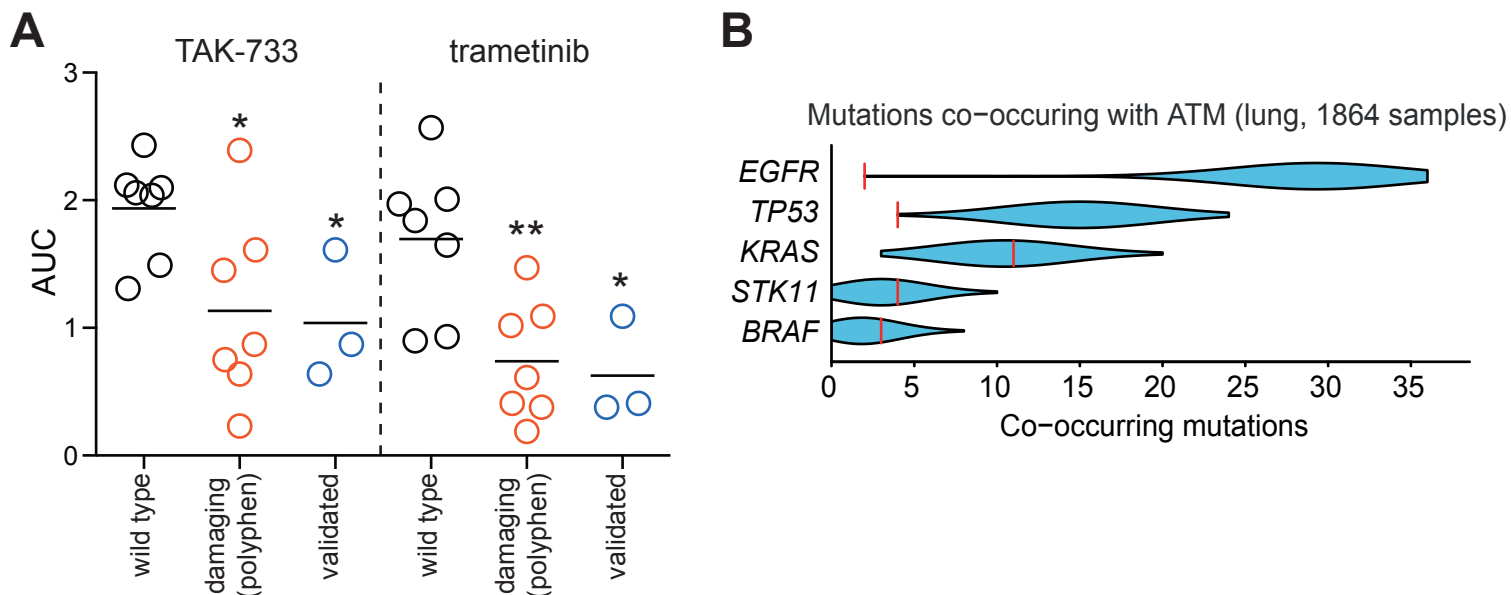

**Supplementary Figure 7. Enrichment of validated ATM mutant cells among sensitive lines. (A)** AUC data from 16 cell lines as in (Fig. 3B) for trametinib and TAK-733. Functionality of ATM mutations is indicated. Neutral mutations (NCI-H1703, NCI-H2172) were not included in the analysis. Black bars indicate mean, \*  $P < 0.05$ , \*\*  $P < 0.01$ , two sided t test. **(B)** Violin plots showing distribution of simulated co-occurring mutations for ATM with EGFR, TP53, KRAS, STK11 or BRAF based on COSMIC data. Red lines indicate observed co-occurrence for each combination.



## Supplementary Figure 8

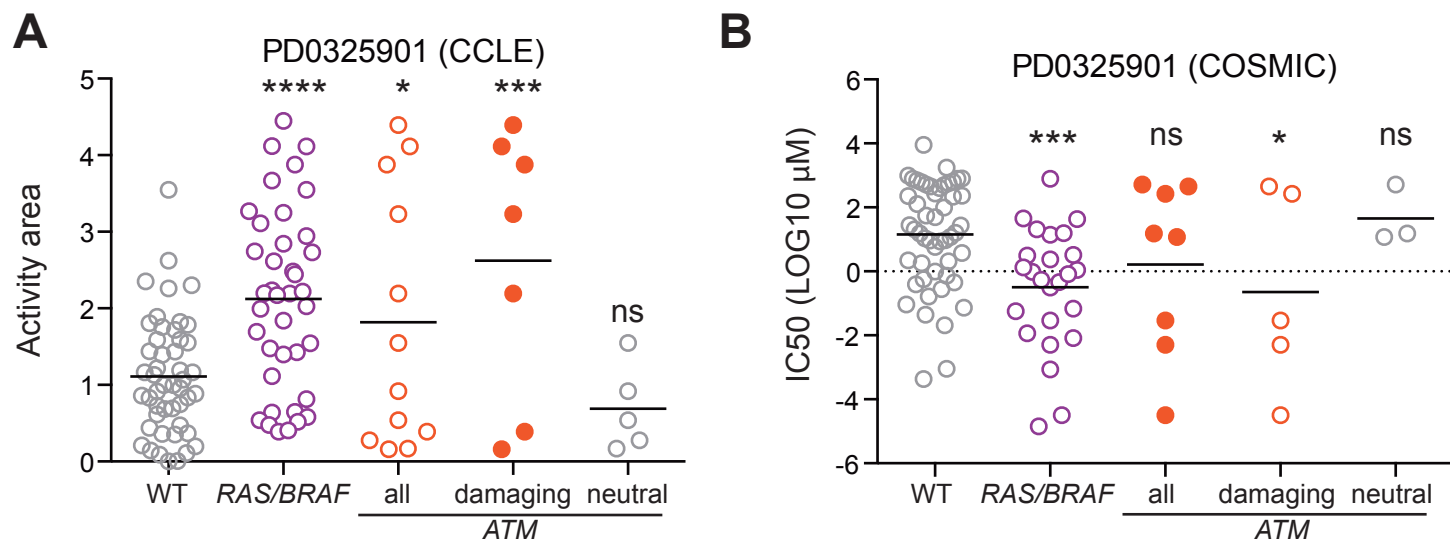

**Supplementary Figure 8. Sensitivity of lung cancer cell lines in the Cancer Cell Line Encyclopedia (CCLE) and COSMIC database to the MEK inhibitor PD0325901. (A)** High Activity Area Score (AAS) indicates drug sensitivity. Each circle indicates a single cell line and cell lines are grouped according to genotype (WT = wild type for K-Ras, H-Ras, N-Ras, BRAF, c-RAF and ATM; ATM = ATM mutant; RAS = K-Ras, H-Ras or N-Ras mutant). ATM mutations are labeled according to PolyPhen (damaging >0.9, neutral <0.9). Black bar indicates mean AAS. \*  $P < 0.05$ , \*\*\*  $P < 0.001$ , \*\*\*\*  $P < 0.0001$ , ns = not significant, two sided t test. **(B)** Inhibitory concentration (IC) 50 of lung cancer cell lines in the COSMIC/Sanger dataset. Each circle indicates a single cell line and cell lines are grouped according to genotype as in (A). ATM mutations are labeled according to PolyPhen (damaging >0.9, neutral <0.9). Black bar indicates mean IC50. \*  $P < 0.05$ , \*\*\*  $P < 0.001$ , ns = not significant, two sided t test.

## Supplementary Figure 9

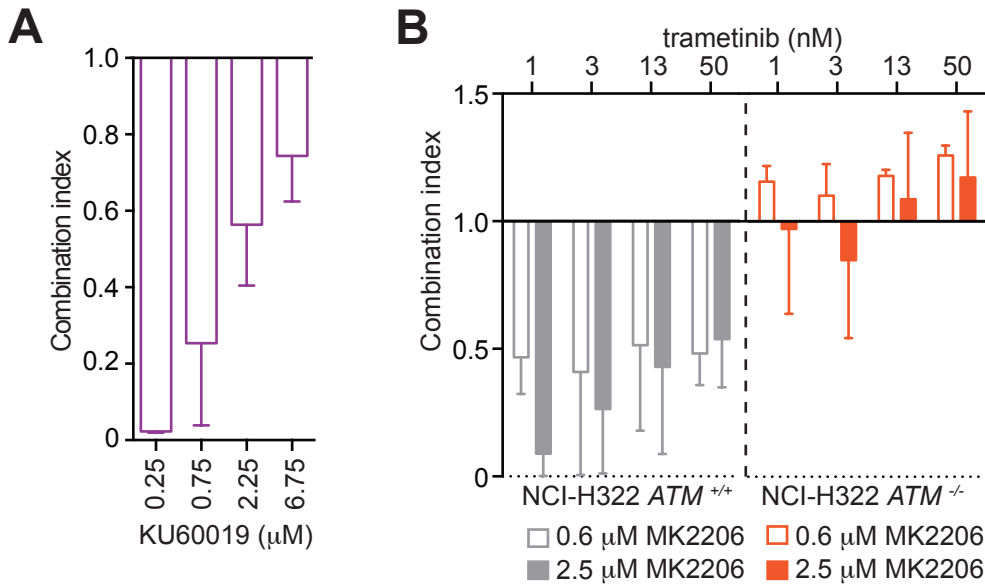

**Supplementary Figure 9. Drug synergy experiment of MEK inhibition combined with ATM or AKT inhibition. (A)** Drug synergy in AALE cells with ATM inhibitor (KU60019) and trametinib (40 nM). Chou Talalay combination index calculated from experiment in figure 5A is shown. Error bars indicate standard deviation ( $n = 3$ ). **(B)** Chou Talalay combination index derived from drug synergy experiment on NCI-H322 control (+/+, grey bars) and ATM knockout (-/-, red bars) cells treated with trametinib and AKT inhibitor MK2206 (0.6  $\mu\text{M}$  and 2.5  $\mu\text{M}$ ) shown in 5E. Error bars indicate standard deviation ( $n = 3$ ).

## Supplementary Figure 10

### A

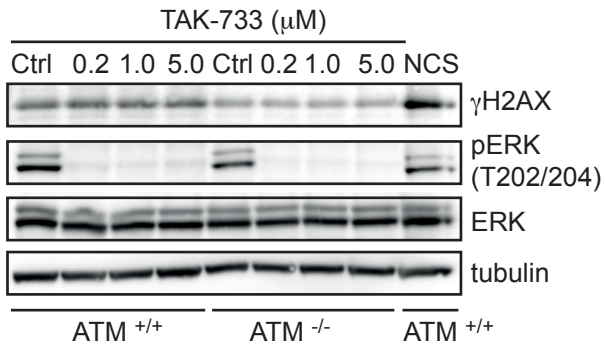

### B

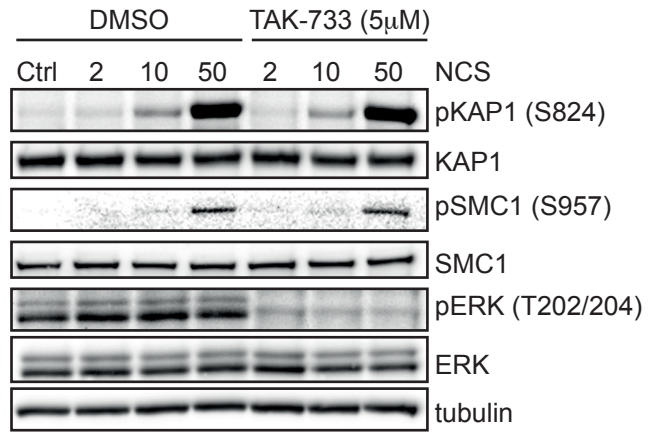

**Supplementary Figure 10. MEK inhibition does not affect the DNA damage response. (A)** Western blot analysis of wild type or ATM mutant NCI-H322 cells treated with TAK-733 (6 hours) or NCS (50 ng/ml, 30 minutes). **(B)** Western blot analysis of NCI-H322 cells treated as indicated (NCS at 2, 10, 50 ng/ml for 30 minutes; TAK-733, 2 hours).

## Supplementary Figure 11

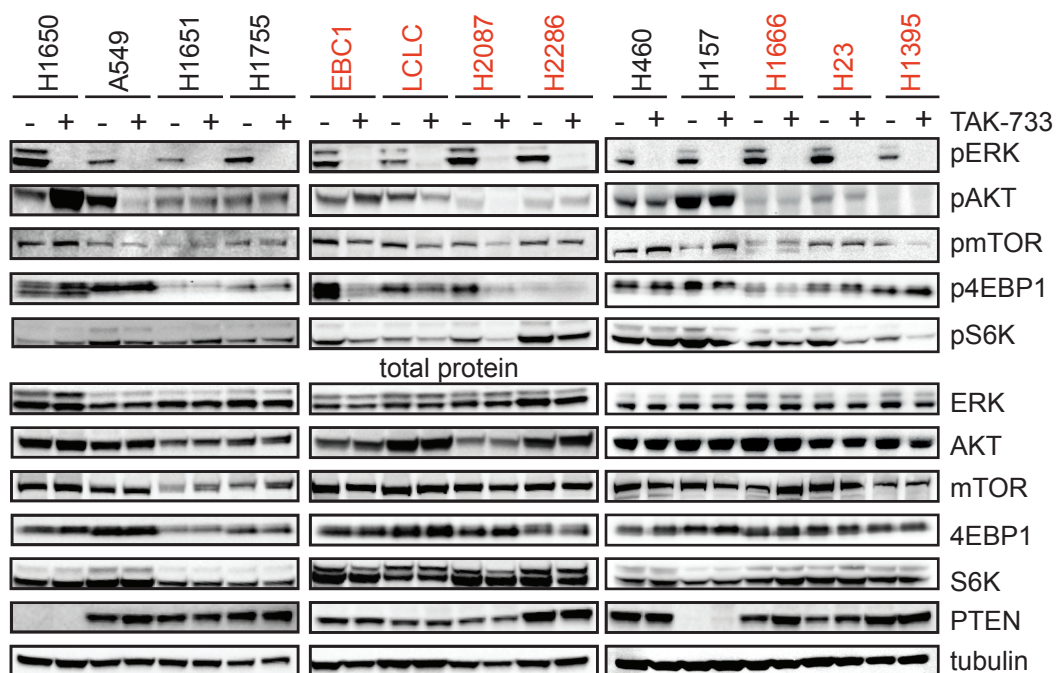

**Supplementary Figure 11. Altered AKT/mTOR signaling in ATM mutant lung cancer cells.** Western blot analysis (pERK (T202/204); pAKT (S473); p-mTOR (S2448); p4EBP1 (T37/46); pS6K (T389)) of indicated lung cancer cell lines treated with DMSO or 1 μM TAK-733 for 6 hours. ATM mutant cell lines are marked in red.

## Supplementary Figure 12

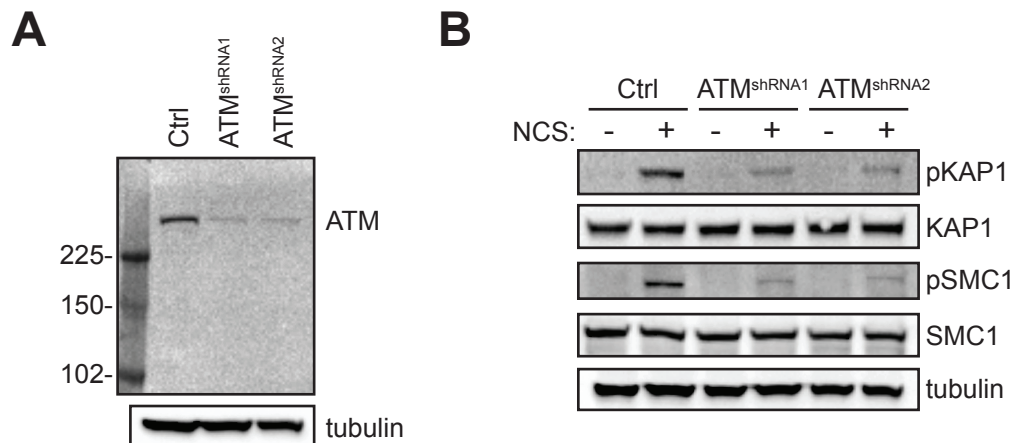

**Supplementary Figure 12. Impaired DNA damage response in ATM knockdown NCI-H460 cells. (A)** Western blot analysis of ATM expression in NCI-H460 cells infected with ATM knockdown vectors. **(B)** Western blot analysis of ATM kinase activity in NCI-H460 cells infected with indicated vectors. Phosphorylation of KAP1 and SMC1 in response to treatment with neocarzinostatin (50 ng/ml, 30 minutes) is shown.

# Supplementary Figure 13 (I)

## A

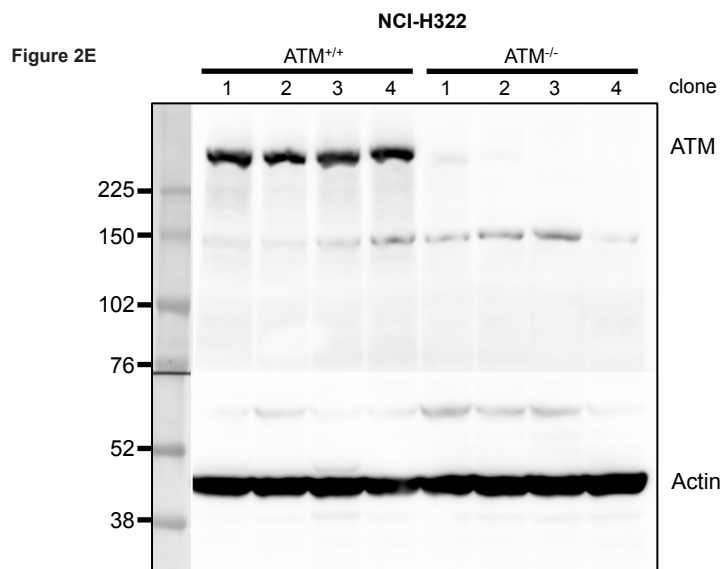

## B

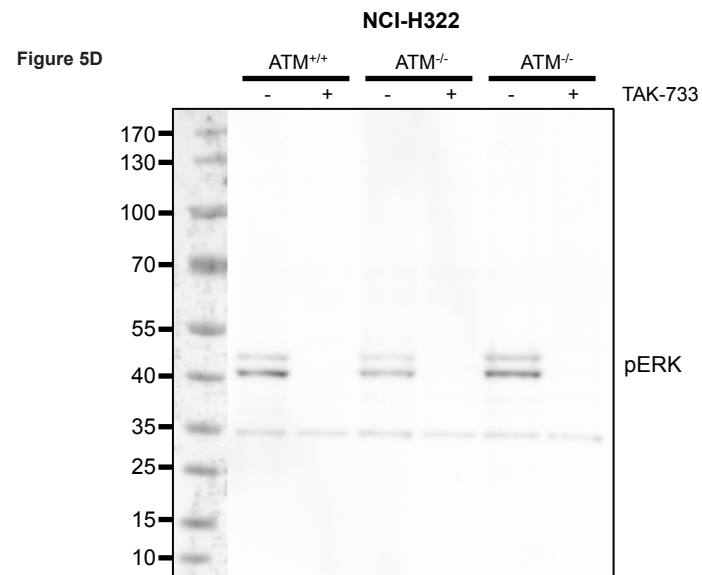

## C

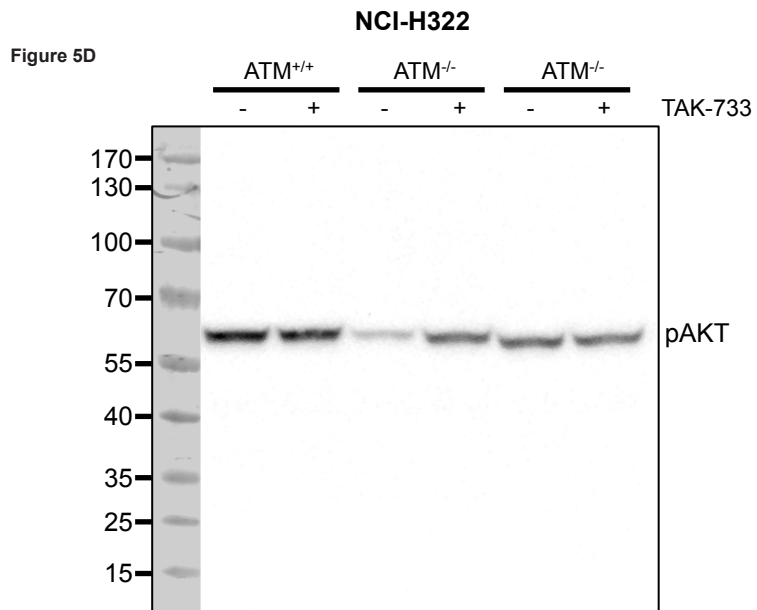

## D

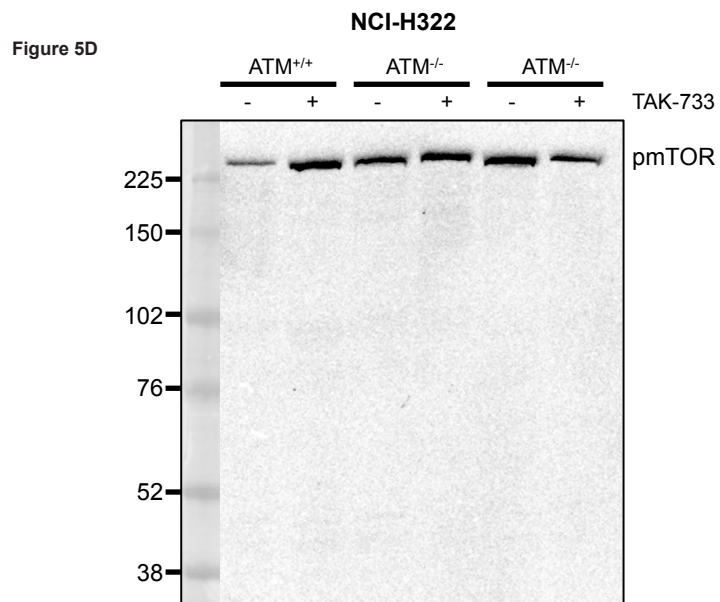

# Supplementary Figure 13 (II)

## E

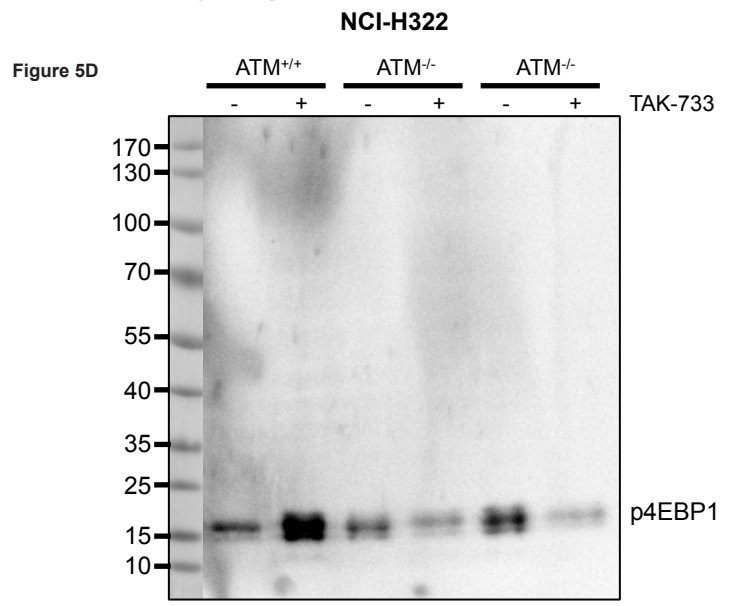

## F

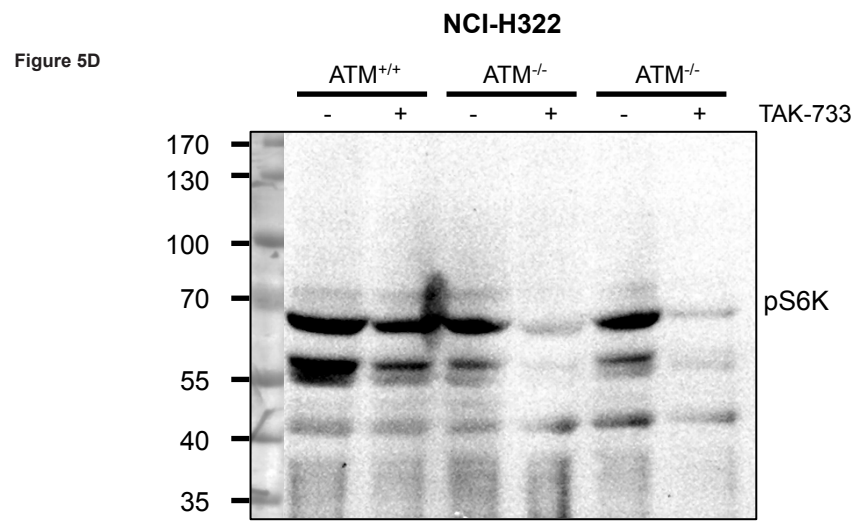

## G

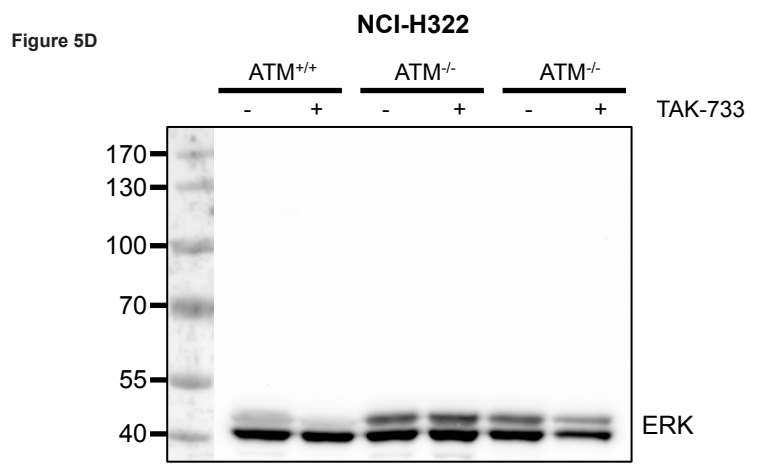

## H

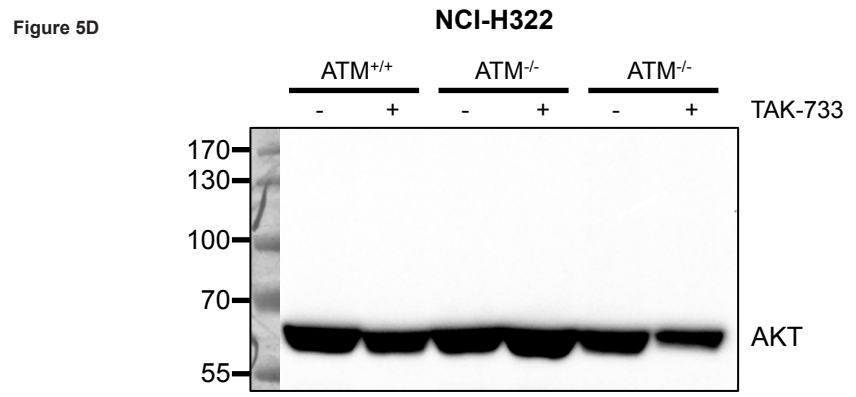

# Supplementary Figure 13 (III)

## I

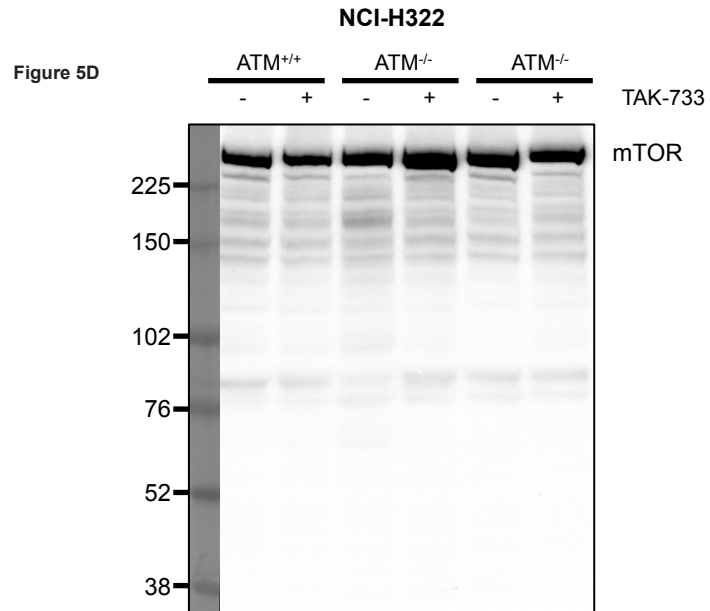

## J

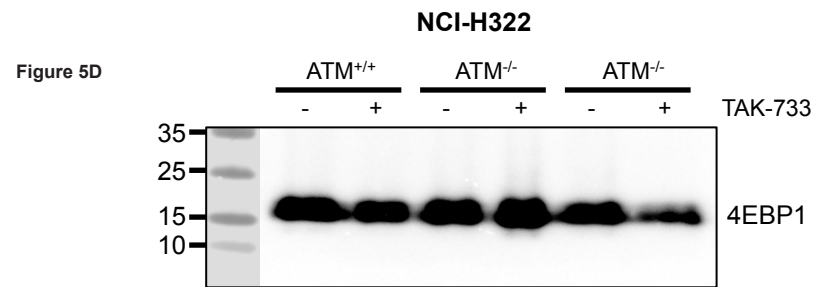

## K

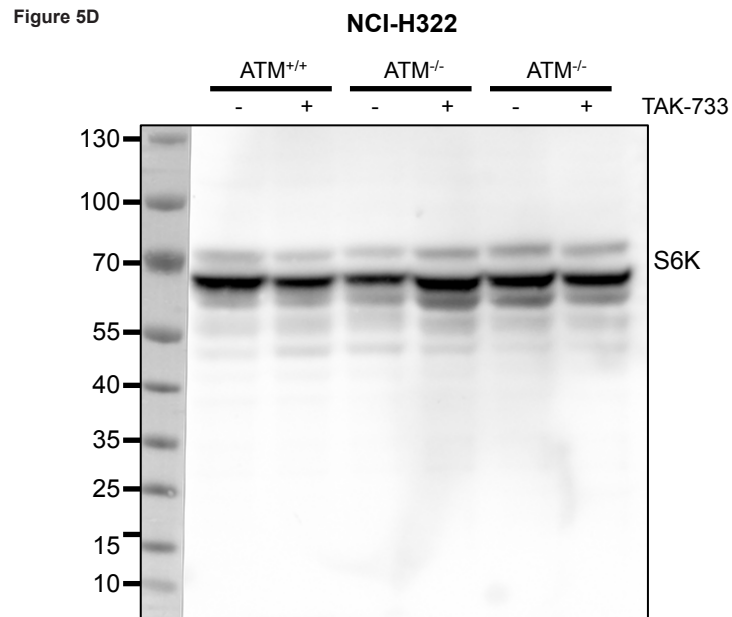

## L

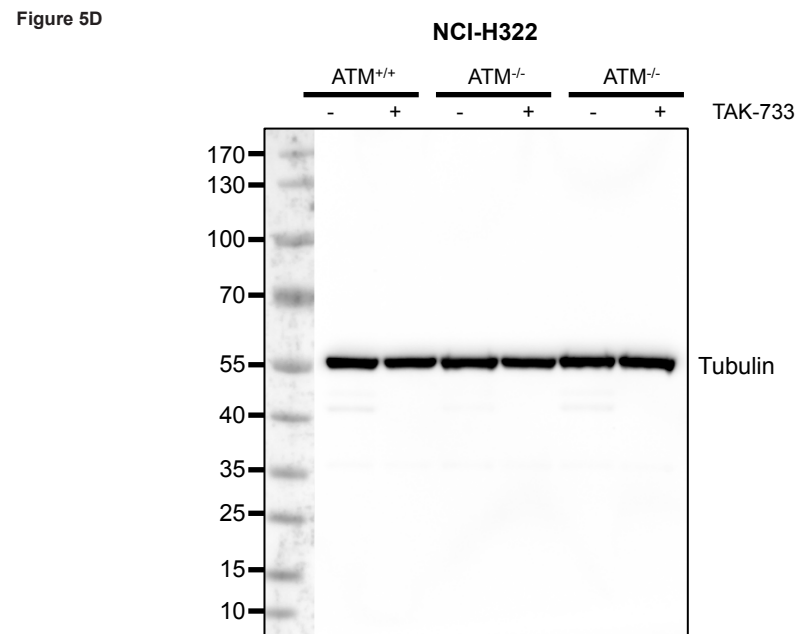



## Supplementary Table 1

### Constructs for the isogenic cell line panel

| Gene             | Vector designation | Sequence                                                       | Source                                                                                                              |
|------------------|--------------------|----------------------------------------------------------------|---------------------------------------------------------------------------------------------------------------------|
| APC              | pLKO.1-shAPC       | CCGGTAATGAACACTACAGATAGAAGTTCGAGTTCTATCTGTAGTGTTCATTATTTTTG    | TRCN0000010297                                                                                                      |
| ATM              | pLKO.1-shATM1      | CCGGGGATTGCGTATTACTCAGTTCAAGAGACTGAGTAATACGCAAATCCTTTTTT       | NA                                                                                                                  |
| ATM              | pLKO.1-shATM2      | CCGGGACTTTGGCTGTCAACTTTCTGTTCAAGAGACGAAAGTTGACAGCCAAAGTCTTTTTT | NA                                                                                                                  |
| BRG1 (SMARCA4)   | pLKO.1-shBRG1      | CCGGCATGCACCAGATGCACAAGTTCAAGAGACTTGTGCATCTGGTGCATGTTTTT       | designed from <a href="http://www.ncbi.nlm.nih.gov/pubmed/19149898">http://www.ncbi.nlm.nih.gov/pubmed/19149898</a> |
| ERBB4            | pLKO.1-shERBB4     | CCGGCCAGACTACCTGCAGGAGTACCTCGAGGTAAGTCTGAGGTTAGTCTGGTTTTT      | designed from <a href="http://www.ncbi.nlm.nih.gov/pubmed/17521571">http://www.ncbi.nlm.nih.gov/pubmed/17521571</a> |
| NF1              | pLKO.1-shNF1       | CCGGGGACACAATGAGATTAGATTTCAAGAGAATCTAATCTCATTGTGCCTTTTTT       | NA                                                                                                                  |
| p14-ARF (CDKN2A) | pLKO.1-sh-p14ARF   | CCGGCATGGTGCAGGTTCTTGTTCAGAGACAAGAACCTGCGCACCATGTTTTT          | designed from <a href="http://www.ncbi.nlm.nih.gov/pubmed/14585358">http://www.ncbi.nlm.nih.gov/pubmed/14585358</a> |
| PRKDC            | pLKO.1-shPRKDC     | CCGGGATCGCACCTTACTCTGTTCTCGAGAACAGAGTAAGGTGCGATCTTTTTT         | designed from <a href="http://www.ncbi.nlm.nih.gov/pubmed/12438223">http://www.ncbi.nlm.nih.gov/pubmed/12438223</a> |
| PTEN             | pLKO.1-shPTEN      | CCGGAAGGCACAAGAGGCCCTAGATTTCTCGAGAAATCTAGGGCCTTGTGCCTTTTTT     | designed from <a href="http://www.ncbi.nlm.nih.gov/pubmed/17300726">http://www.ncbi.nlm.nih.gov/pubmed/17300726</a> |
| SMAD4            | pLKO.1-shSMAD4     | CCGGGCAGACAGAACTGGATTAAGTTCGAGTTAATCCAGTTTCTGTCTGCTTTTTG       | TRCN0000040028                                                                                                      |
| STK11            | pLKO.1-shSTK11     | CCGGGAAGAAGAAGTTGCGAAGGATCTCGAGATCCTTCGCAACTTCTTCTTTTTG        | TRCN0000000410                                                                                                      |

### CRISPR sgRNA sequences

| Gene | Targeted region       | Sequence                |
|------|-----------------------|-------------------------|
| ATM  | Exon 6                | GGATGCTGTTCTCAGACTGACGG |
| ATM  | H23 mutation (c.5756) | ACTACATGAGAAGACCAAAGAGG |

Supplementary Table 1. List of constructs used in the paper, including vectors, sequences and their original source.

## Supplementary Table 2

| DRUG NAME            | TARGET            | SCREENED CONCENTRATION (uM) |       |  | DRUG NAME           | TARGET                     | SCREENED CONCENTRATION (uM) |      |    |
|----------------------|-------------------|-----------------------------|-------|--|---------------------|----------------------------|-----------------------------|------|----|
|                      |                   |                             |       |  |                     |                            |                             |      |    |
| (s)BI-2536 TsOH Salt | PLK1              | 1                           | 3.8   |  | Lapatinib           | HER2                       | 0.14                        |      |    |
| ABT-737              | BCL2              | 2.5                         |       |  | Masatinib           | cKIT                       | 0.16                        |      |    |
| ABT-869              | VEGFR             | 20                          |       |  | Merck-5             | JAK                        | 0.26                        |      |    |
| AC220                | FLT3              | 3.6                         |       |  | Motesanib           | VEGFR                      | 5.4                         | 20   |    |
| AG13958              | VEGF              | 1.7                         |       |  | MP-470              | Multi Kinase               | 45                          |      |    |
| Akt-I-1              | AKT1              | 50                          |       |  | Nilotinib           | BCR-ABL/KIT                | 1.5                         |      |    |
| Akt-I-1,2            | AKT1              | 20                          |       |  | Paclitaxel          | Microtubule                | 0.0002                      |      |    |
| AMG-Tie2-1           | TIE-2             | 1.7                         |       |  | Pazopanib           | VEGFR                      | 1.8                         |      |    |
| AS-252424            | PI3K              | 6.6                         |       |  | PD0325901           | MEK                        | 0.17                        |      |    |
| AT7519               | CDK               | 1.3                         | 5.2   |  | PD173955            | BCR-ABL                    | 1.1                         |      |    |
| AT9283               | Aurora Kinase     | 0.05                        |       |  | PD173955-Analogue 1 | BCR-ABL                    | 1.8                         |      |    |
| AV-412               | EGFR              | 0.02                        |       |  | Pemetrexed          | Antifolate, antimetabolite | 1.5                         |      |    |
| AV-951               | VEGFR             | 4.4                         |       |  | PF-04217903         | cMET                       | 20                          |      |    |
| Axitinib             | VEGFR             | 0.05                        |       |  | PF431396            | PYK2                       | 0.02                        |      |    |
| AZ-960               | JAK2              | 0.06                        |       |  | PF-562271           | FAK/PYK2                   | 0.16                        |      |    |
| AZD6244              | MEK               | 0.17                        |       |  | PI103               | PI3K                       | 0.23                        |      |    |
| AZD7762              | CHK               | 0.02                        | 0.06  |  | PIK-75              | PI3K                       | 0.001                       |      |    |
| BEZ235               | PI3K/mTOR         | 0.01                        | 0.04  |  | PIK-90              | PI3K                       | 0.23                        |      |    |
| BI-D1870             | p90RSK            | 0.05                        | 0.2   |  | PIK-93              | PI3K                       | 2                           |      |    |
| BMS-2                | MET               | 4.4                         | 18    |  | PLX4720             | BRAF                       | 5                           | 20   |    |
| Bosutinib            | SRC               | 0.02                        |       |  | Purvalanol B        | PARP                       | 1.2                         |      |    |
| BX795                | PDK1/TBK1         | 1.4                         |       |  | R1487               | MAPK                       | 47                          |      |    |
| BX912                | PDK1              | 0.04                        |       |  | Rho-15              | ROCK                       | 1.2                         | 5    | 20 |
| CC-401               | JNK               | 18.8                        |       |  | RWJ-67657           | MAPK                       | 4.7                         |      |    |
| CI-1033              | EGFR/HER2         | 0.04                        |       |  | SB202190            | MAPK                       | 6                           | 24   |    |
| CI-1040              | MEK               | 0.17                        |       |  | SB203580            | MAPK                       | 20                          |      |    |
| Cisplatin            | DNA-crosslinking  | 2                           |       |  | SB216763            | GSK3                       | 1.2                         | 5    | 20 |
| CP690550             | JAK2              | 64                          |       |  | SB242235            | MAPK                       | 23                          |      |    |
| CP-724714            | HER2              | 4.3                         |       |  | SB590885            | BRAF                       | 18                          |      |    |
| Crizotinib           | ALK, c-MET        | 0.5                         |       |  | SNS-032             | CDK                        | 0.005                       | 0.02 |    |
| CYC-116              | Aurora Kinase     | 0.05                        | 0.2   |  | SNS-314             | Aurora Kinase              | 1.2                         | 20   |    |
| CYT11387             | JAK2              | 0.2                         |       |  | Sorafenib           | Multi Kinase               | 0.17                        |      |    |
| Dasatinib            | BCR/ABL           | 0.001                       | 0.004 |  | SR3677              | ROCK                       | 4.9                         |      |    |
| Docetaxel            | Microtubule       | 0.00005                     |       |  | SU-5402             | FGFR1                      | 6.8                         | 27   |    |
| Doxorubicin          | Topoisomerase II  | 0.005                       | 0.01  |  | SU-6668             | Multi Kinase               | 26                          |      |    |
| E7080                | VEGFR             | 4.7                         |       |  | Sunitinib           | Multi Kinase               | 1.5                         |      |    |
| Erlotinib            | EGFR              | 0.1                         |       |  | TAK-715             | MAPK                       | 5                           |      |    |
| Etoposide            | Topoisomerase II  | 0.05                        | 0.1   |  | Tandutinib          | FLT3                       | 0.9                         | 3.6  |    |
| Flavopiridol         | CDK               | 0.005                       |       |  | TG100115            | PI3K                       | 23                          |      |    |
| GDC-0941             | PI3K              | 0.04                        |       |  | TG101209            | JAK2                       | 0.16                        |      |    |
| Gefitinib            | EGFR              | 0.2                         |       |  | TG101209 Deriv 1    | JAK2                       | 0.16                        |      |    |
| Gemcitabine          | Antimetabolite    | 0.001                       | 0.002 |  | TG101209 Deriv 2    | JAK2                       | 0.16                        |      |    |
| GSK690693            | AKT1              | 1.2                         | 4.7   |  | TG101348            | JAK2                       | 0.38                        |      |    |
| GW441756             | TRKA              | 7                           | 29    |  | TGX221              | PI3K                       | 55                          |      |    |
| IC87114              | PI3K              | 5                           | 20    |  | Topotecan           | Topoisomerase I            | 0.001                       |      |    |
| Ifosfamide           | Nitrogen mustard  | 50                          |       |  | Vandetanib          | VEGFR                      | 0.17                        |      |    |
| Imatinib-Mesylate    | BCR-ABL           | 3.4                         |       |  | Vargatef            | VEGFR/PDGFR                | 0.9                         |      |    |
| Irinotecan           | Topoisomerase I   | 0.2                         |       |  | Vinblastine         | Microtubule                | 0.0005                      |      |    |
| JNJ-38877605         | cMET              | 20                          |       |  | Vinorelbine         | Anti-mitotic               | 0.001                       |      |    |
| JNJ-7706621          | CDK/Aurora Kinase | 0.2                         |       |  | VX-680              | Aurora Kinase              | 0.04                        | 0.17 |    |
| Ki20227              | VEGFR/cFMS        | 4.2                         | 17    |  | VX702               | MAPK                       | 50                          |      |    |
| KU0063794            | mTOR              | 0.2                         |       |  | YM201636            | PI3K                       | 1.6                         |      |    |
| KU55933              | ATM               | 5                           |       |  | ZSTK474             | PI3K                       | 0.05                        | 0.2  |    |

**Supplementary Table 2. List of small molecule compounds with their primary targets and concentrations used in the screen.**

### Supplementary Table 3

CRISPR-Cas9 editing of H322 lung cancer cell line

| NCI-H322                 |    |
|--------------------------|----|
| Total clones analyzed    | 59 |
| Clones edited            | 12 |
| In frame                 | 1  |
| Heterozygous frame shift | 7  |
| Homozygous frame shift   | 4  |

| Clones | Allele 1                            | Allele 2                  |
|--------|-------------------------------------|---------------------------|
| WT     | GATGCTGTTCTCAGACTGACGGATT           | GATGCTGTTCTCAGACTGACGGATT |
| 1      | GATGCTGTTCTC----TGACGGATT           | GATGCTGTTCTC----TGACGGATT |
| 2      | GATGCTGTTCTCAGAC <u>C</u> TGACGGATT | (del. >100bp)GACGGATT     |
| 3      | GATGCTGTTCTCA----GACGGATT           | GATGCTGTTCTCA----GACGGATT |
| 4      | GATGCTGTTCTC----TGACGGATT           | GATGCTGTTCTCAGAC-GACGGATT |

**Supplementary Table 3. Overview of isolated clones edited with CRISPR-Cas9 system.** Numbers of individual clones modified by heterozygous and homozygous frame shift is depicted. Edited sequence for both alleles is shown for the homozygously edited clones and compared to wild type.

## Supplementary Table 4

### Off target site prediction and analysis

| sgRNA ATM exon 6          | Gene      | Mis matches | PAM | Clones with mutation (Sanger) | CRISPR.mit.edu score |      |
|---------------------------|-----------|-------------|-----|-------------------------------|----------------------|------|
| GGATGCTGTTCTCAGACTGA CGG  | ATM       | NA          | Yes | NA                            | NA                   |      |
| AGAAGCAGTTCTCAGACTGA AAG  | TCP1      | 3           | No  | 0/2                           | 1.7                  |      |
| GTATGTTCTCCTCAGACTGA GGG  | GAPDH     | 4           | Yes | 0/2                           | 0.8                  |      |
| TGACGCTTTTCTCAGACTGC CAG  | GALNT2    | 4           | No  | 0/2                           | 0.7                  |      |
| GGAAGCAGAGCTCAGACTGA AGG  | VAV1      | 4           | Yes | 0/2                           | 0.5                  |      |
| GCATTAATGTTATCAGACTGA TAG | CLEC9A    | 4           | No  | 0/2                           | 0.5                  |      |
|                           |           |             |     |                               |                      |      |
| sgRNA ATM H23 mutation    | Gene      | Mis matches |     | Clones with mutation (Sanger) | CRISPR.mit.edu score |      |
| ACTACATGAGAAGACCAAAG AGG  | ATM (H23) | NA          | Yes | Verified in NCI-H23           | NA                   |      |
| ACTACATGAGAAGACAAAAG AGG  | ATM (WT)  |             | 1   | Yes                           | NA                   | 17.2 |
| GCTAGATGAAATGACCAAAG AAG  | RPGR      |             | 4   | No                            | NA                   | 0.7  |
| AGTGGATGAGAAGACCAAGG AAG  | TLN1      |             | 4   | No                            | NA                   | 0.5  |

**Supplementary Table 4. CRISPR off-target site prediction and analysis.** Off-target sites for individual sgRNAs were predicted using the analysis tool available at [crispr.mit.edu](http://crispr.mit.edu). Predicted off-target score is depicted in the rightmost column. Two clones were analyzed by Sanger sequencing for the presence of off-target modification predicted for sgRNA exon 6. No editing was observed within 5 top predicted off-target sites.

## Supplementary Table 5

|               | Sensitivity*       | True positive      | False positive     |
|---------------|--------------------|--------------------|--------------------|
| KRAS/BRAF     | <b>9/14 (64%)</b>  | 9/39 (23%)         | 30/39 (76%)        |
| ATM           | 4/14 (29%)         | <b>4/7 (57%)</b>   | <b>3/7 (43%)</b>   |
| KRAS/BRAF/ATM | <b>11/14 (78%)</b> | <b>11/41 (27%)</b> | <b>28/41 (68%)</b> |

\*Activity area >2 is considered MEKi sensitive

**Supplementary Table 5. Predictive value of ATM mutation as a biomarker for MEKi response.** Calculated sensitivity, false positive rate and true positive rate for ATM, KRAS/BRAF and ATM+KRAS/BRAF based on the CCLE cell line sensitivity data.
